# Supplementary material for: Expanding the scope of methylation-sensitive restriction enzyme (MSRE) PCR for forensic identification of body fluids through the novel use of methylation-dependent restriction enzymes (MDRE) and the combination of autosomal and Y-chromosomal markers
Source: PubMed Central journal article supplement (PMC10861701; doi:10.1007/s00414-023-03097-9), 2023-10-24
Supplement: 414_2023_3097_MOESM4_ESM.pdf [file 414_2023_3097_MOESM4_ESM.pdf]

Inhaltsverzeichnis

Saliva ..... 2

- SA\_chrY\_I cg27355713 ..... 2
- SA\_chrY\_II cg25012987 ..... 2
- SA chrY III cg10213302 ..... 3
- SA chrY IV cg05672930 ..... 3

Non saliva ..... 4

- SA(-)\_chrY\_I cg03905640 ..... 4
- cg09804407 no Hhal cutting site ..... 4
- cg01828798 no cutting site ..... 4
- cg04351468 No cutting site Hhal ..... 4
- cg14442616 No cutting site Hhal ..... 5

Blood ..... 5

- BL\_Y\_I cg03416979 ..... 5
- BL\_Y\_II cg14029254 ..... 5
- BL\_chrY\_III cg08265308 ..... 5
- BL\_chrY\_IV cg10363397 ..... 6
- BL\_chrY\_V cg09460641 ..... 6
- cg00050873 unspecific ..... 6
- cg14005657 not tested ..... 7
- cg04016144 not tested ..... 7
- cg06322277 No cutting site Hhal ..... 7
- cg15935877 not tested ..... 7

non semen ..... 8

- noSp\_Y\_I cg02288797 ..... 8
- noSp\_Y\_II cg04964672 ..... 8
- noSp\_Y\_III cg07728631 ..... 8
- noSp\_Y\_IV cg23834181 ..... 9
- cg27539833 No cutting site Hhal ..... 10
- cg01053349 No cutting site Hhal ..... 10
- cg03515901 No cutting site Hhal ..... 10
- cg04477336 No cutting site Hhal ..... 10
- cg17115812 No cutting site Hhal ..... 10
- cg26520468 No cutting site Hhal ..... 11
- cg23308414 not tested ..... 11

semen ..... 11

- cg00035864 No cutting site Hhal ..... 11
- cg00479827 No cutting site Hhal ..... 11
- cg04817258 No cutting site Hhal ..... 12
- cg25918849 no cutting site ..... 12

cg08921682 No cutting site HhaI ..... 12

cg08593141 unspecific ..... 12

cg05202434 no cutting site ..... 12

cg15781156 No cutting site HhaI ..... 13

GCGC HhaI /GlaI

CCCGGG SmaI

RCGY GlaI

Saliva

SA\_chrY\_I cg27355713

GGGGAGGGGGAGTGGAAATCTGTTAACTGAATTAAGGCCGCGCGCGAAGGGAGGAAGGAGCGCTGGGGACTTGAGTACACCAGGGCCCCGTCCTGTAAAG  
 CACTGGCAACGCAAAAGCACCTTACAAACCGCCGAGGTCTGAAGCCTGGGAGTGGCGGTGGAGGTGAGTCTCCAGCCTCCTTTCAGTTCCTACACCCAGCTC  
 CTGGCTTTTACGCCAGTTTGTCCCTAAGAATTTCTGGCTCTTTTTCTGGGAGGTGTTTTGCAAAGGGGGGAGCCTCTGCCTGTCCCCTTTTTCGAGATGGGAAAT  
 GACAACTGGGGTGTCTTCTAAGACGATTTTGACGGAGATACACCCTCGGACAGGTGACGGGAGTTCCTGTGGGGCAGAGGGCGGCTTCTTTTTCGGTTGGG  
 GGAAGGCAACAGTCTAGCAGTGGCCAGGTTCCCTCGCCACCTCGGCATAGGGGAGGGGCCGGTTCGCAGTTCACCACCTCCTTAGGGGAAGGGCTGG  
 TTCCGGATCTAAACCACTGGGGCGCTGGAGCTGGGGCTGGTGGGAGGCGGTTTCCTCAGCTGGCTGTTGGGGAGGGGGCGGGCCGCGGCGAGTGGGTGCC  
 CTCTCGTCTCAGTCTCCCGGTCCSCGTTTGCATGCTAGCGGCCGCTCCAGTGGTGGTACCAGCCAGTGCCAATCCCTTGCGCCGCGTGCATCTCCGCTC  
 TGTCTCTCAGCCGCCGCGCCGCTCCAGTGCCTCCCAATTGCGCTCGGGAGTGAGGAGCCGCCAACACCCAGCTCCGCTGCTGCCGCCACCGCAGTGTCTCT  
 TAGTCGCCATTGGTTACCTAAACTTTCCAGTACCCCGGACCTTTCCGGGACTCCGCGGGCGGGGGCAGAGGGCGGCCAGGGGGCGGCACCGGGCTGCTCCGGT  
 GCGCCGGGCTCTTTTCGGCCGCCACGGCCGGCCTCACAGGCTGCCCTCTGAGAGAGGCTCAGAACACGGCC

- cg27355713 (Speichel 63%, Blut 5%, Sperma 3%)
- cg04042030 (Speichel 18%, Blut 1%, Sperma 1%)
- cg02839557 (Speichel 14%, Blut 1%, Sperma 1%)
- cg01707559 (Speichel 16%, Blut 9%, Sperma 1%)
- cg15197499 (Speichel 18%, Blut 8%, Sperma 6%)

SA\_chrY\_I for: TM: 64°C, 20 nt

AGTCTAGCAGTGGCCAGGT

SA\_chrY\_I\_rev 60°C

SA\_YI\_cut1\_I, 64°C, 19nt  
 GAAACCCGCCTCCACAG

SA\_YI\_cut1,2\_I, 66°C 19nt  
 CAGCGACAGAGGGCGGGAC

SA\_YI\_cut1,2,3\_I, 66°C 20nt  
 GAATTGGGGGCACTGGAGCG

SA\_chrY\_II cg25012987

GAGTTACCCGTTCTACCTTAAACATCCAAGTTGACGGTCAAGTCCAAGCGCTCGCCGATGACATCTTATGGACCCAGGGCTCGCGGAAGGACCCAGTTGGA  
 TTATCACACCAAGCCGCCACCTTTGCTGCCATCTAACTCCGCCGACCTGCCCGAGTTCCTCCACTCTCCGCTGGTTGACCGGGGCGAGCGGAGAGAGGAGGAA  
 AGCACAAAGGCAGTGACTGGTTCATATCCCATCGCCGCGCTGGGGTGGGGAGAGGGGGCCGTGACCCCATCGGCCACCACTGGGCACCGGTGAACACTAC  
 TCGGACAGGAACCGCAGGGGGCACACCTCGGACAACTCCTGAGTCACTTCTACCAGGCTCGGTGAATCCAATCTAGCCCCTGGAGGAGTTCACAGCGGG

GTGCGAGGAGGAGGTGGAATCGGAGAGGTGGAAGGAGGAGCAGGGGAGCCACCTCTACCTCAGCAACCCCTG**GCGC**GGCACCTTGAAAGCCCGAGGGTG  
GGG**ACGT**GAGCCTCCAATGCACAGCGG**GCGC**CGATGAGCTCTCGCGAGAGACCCCACT**BCGT**GATCCGGGGCTCAGGGGTGGGTGG

**cg25012987** (Speichel 88%, Blut 36%, Sperma 10%)

**cg16292375** (Speichel 21%, Blut 39%, Sperma 6%)

**SA\_chrY\_II\_for** TM: 64°C, Länge: 21 bp

**SA\_chrY\_II\_rev** TM: 64°C, Länge: 19 bp

**SA\_chrY\_II\_for\_alter** TM: 64°C, Länge: 19 bp

### SA chrY III **cg10213302**

ATGCCAAAGATGAAACACTGCCATAAAGAACACACTAGACATTACAAATCTTGGTCAAATACT**ACGT**TA**ACGG**AAAAAAAAAATCAATTGGCTCAGTA  
ATTGATTAGGATAATCTCCCTCCTCTTGGCTGTACTGTGGCAAGTCCATTACTTTCTTTTTTTTTTTTAAAGCCAACAAAGGAGACAGTGGGGAATGT  
ATATGTCTGTATCTGCTTCTCCTCAACCTAGGAATAAAGTA**AACA****CG****TTACTGAGGGCGG**GGGTCTAAGGGCCTGCAACAATGAGATCTGTCGCTTGGC  
TAGGACTG**GCGCCG**AGAGG**CG**ATAGGTCT**CG**GGAGAGCCTG**GCGC**AGGGTGTGGGAGATTAGGAATCCAGGTCCACCGGAGATGGCAGGGGGTGGCCTG  
GCCCGTGCGGGGCGCTTGCT**GCACGCAACCAACTAAGGC**GGTGGT**GCGC**CAAGTAGTGGTGACGGCGG**GCGC**GCGGAGAAAAGGA**ACGT**TGTGACGGA  
AACTCCAGCTGCCGGAGACCCACCGCAGTGAGGTCACTGGACTCCCGGACTCGGG**BCGT**GACCG**GCGC**CGACCCGGG**GCGC**CGA

**cg10213302** Speichel 55% (15%), Blut 10% (3%), Sperma 3%

**cg02577797** (Speichel 19% (17%), Blut 8% (2%), Sperma 6% (2%))

**cg00272582** (Speichel 23% (22%), Blut 6% (2%), Sperma 5% (2%))

**cg24837623** (Speichel 22% (19%), Blut 3% (2%), Sperma 3% (1%))

**cg27433982** (Speichel 15% (18%), Blut 3% (1%), Sperma 2% (1%))

**cg03683899** (Speichel 12% (16%), Blut 1% (0,4%), Sperma 0,3% (0,3%))

**cg02842889** (Speichel 14% (19%), Blut 1% (0,4%), Sperma 1% (0,4%))

**SA\_chrY\_III\_for** TM:62°C 20 bp

**SA\_chrY\_III\_rev** TM:60°C, 19 bp

### SA chrY IV **cg05672930**

GAGAGGTAACACCGAGAAGAGGCGCG**CG**GTG**GCGC**CAAGACGATTGGTGCCAAACAGGGCAGA**ACGT**AACTCAGCTCTGGGGTGGGTTCTGTCCAGAG  
GGGTAGAGAAGAGTGGCTGAGG**GCGC**GCCCTGATCTCAGCGGGAAGAGTGCACCCCGAGG**GCGC**CGTAGGTATGAAAGCC**ACGT**GTGGCTGGCACCCGCG  
GGGACCC**ACGT**ACCAGGTGTACCTTTCCAGTCCCTGCCGTGCCTTATCCCGGTGCTGGTACCAC**CG**TCTAGGGCTTACTTGGGACACAGGCTAGTTCTCTC  
CTGAAGCTATTGAGC**AGTATGTGTTGAGGT****GCGCT****ACGC**CAGTTGAGGTGAAGCTGTTACACAGTATGAAAGC**CG**GGCTTTGTAGCTGCAGCT**GCGC**ATTGCA  
CCC**CCAGCT****ACGCAGTCTCCTT**CCTTCTCAGTCACAGGACCGGATGGCAAGTGGCCGACCCAGTCGGTGAGACCGACTGAGCTCTGGGGCTTCAGTTCTTG  
**CGC**TACCTACATGGTACATCTCCAGCCAAGGATGAGAGGTGATGCCAGAGGACCTCGATCTAAATTGGGCACCAATTATCGTATGACA

**cg05672930** Speichel 36% (15%), Blut 4% (0,4%), Sperma 4% (1%); **cg17660627** (Speichel 23% (16%), Blut 5% (1%), Sperma 4% (1%))

**cg07731488** (Speichel 17% (21%), Blut 1% (0,4%), Sperma 1% (0,4%))

**SA\_chrY\_IV\_for** TM: 60°C, 20 bp

**SA\_chrY\_IV\_rev** TM: 62°C 20 bp

**SA\_chrY\_IV\_alter\_for** TM: 64°C, 20 bp

**SA\_chrY\_IV\_alter\_rev** TM:62°C, 20 bp

**Non saliva**

**SA(-)\_chrY\_I cg03905640**

AGCTATGAAATATCTGAGATGAGCAAGTGATTACACAAGGAGACAGAAGCAGTATGACCTTTACCTGTGACCCGGTTCAATTATTTTCAGGCTCTCATTAAACCAG  
GCGAGCTCCTCTTTCTCAGAGGTAGGTAAACTTGAGGGGGTAAAGTAGGATTTGGGATTTGGGGATAATGGAAAAGAAAGCCTGGTAATTTTCTTCTATCC  
CTGTTTTAAATAAAAAGTAAACATAAATGCCCTTTCTCAGGGCCCAATGTTAGGCAA  
AAACAATGTTTGTCTATCTCAGTACACACATGGTCATTTATTTTTCC  
CTCTGCATGTTGTGCGCTTTTTCAGTTTATAATGTCCCTGATCCACTTGTCTCATACTAGCTGCAAACAAGGAACTGAATGTCACACCAGGTGGCCAGCATTTC  
GTGAAGGGCAGAAACCGG  
GGCAGCCAAACAGCTGGCAGAGGCCAGCTAGTAAGTACCTGATGCCACTCCGTAGAGGACTCCACACTTAAAAGACCAATAA  
GCAAGTGTGAGGCTGACTCACTTGTATCCCCCAAATAAAAAAATAAAAGTAAACCCCTCCAGGGAAAGTGTGTGTGA

cg03905640 (Speichel 9% (14%), Blut 94% (1%), Sperma 94% (1%)),

SA(-)\_chrY\_I\_for

SA(-)\_chrY\_I\_rev

SA(-)\_chrY\_I\_alter\_for

SA(-)\_chrY\_I\_alter\_rev

**cg09804407 no HhaI cutting site**

TGCATCAACACTTTTAGTTATGAAAGAAGTCTTCAAGAGACCAGCACTGAAGCATGTACTTGAATGCACCATCTGTACAGTTTTTTTTTTTTTACAAGAACT  
GAGATTGAGAACAGTGAAGTATGTAGCCTAAATATATATGTGCACTTGTAGTGAACAAGGAAAATTCGTGTCCAAAGTCTACACTCTTTTCATTTGATGATTTTC  
CCCTTGTGGCCTGATAAATCCACATCACAATGACAGGATGGCCTGGATGCATGCTTCTATTTTGTCTACTGGAAAACCTTTAGATCTGCATGCATATCCCCT  
TAGGAAAGAGTGAATAATGCCTTAAACATTTGAGAAAAAGTTCTTTTATAACCGTCTGGTAAACAATAGTGAATAATGGTAGGTGTCATTATTACACTTGCAT  
AACCTGTACAATTCTGACGTTCGGTTTGTTCATTCAACATAGATGTGATGAGTGTTTTCTAAATGTCAGGCATTGTTTCTGGTGATAGGATATACAGCCAGGAT  
TAAGAAAAGTGTGACACTAGGCATGGTGACTGCGCGTGTATCCAACACTTTGAAAGTTTGATTGAGGAG

cg09804407 (Speichel 9% (14%), Blut 85% (4%), Sperma 88% (2%));

cg08816194 no, saliva 14%, blood 87%, semen 89%

**cg01828798 no cutting site**

GCCTCCCAATTTACAGTAGATTTATGATCCACATAAAAAATAAACAAGGAGCCCCACAGCTCAAGCCAAGCCGATGGACAGGTCATCAACTAAAGGGTTGG  
TGACTCAAAAAAAGGAAGAAGTATTACACACACACACACATACAGATGCCACACAGACATGCGGACATTCAACATTAGCAACTCTTGACAG  
AAACACAGCCCACTCCCTTGGCTGTGTGTTTCTGAGGAAACCCCACTCAAGAGAGCCAACCTAAGGTACAGAGGCAGGCTAGAAATCTGACTGTGGC  
AAGTTTCAAAAAGACTCATATCTACAACCCCTAGGCAGGCCAAGGAATCCTGCAGATTTTTTGTCTTAATGATTCCACAATTTTCTGGGGTTGATTTGA  
CGTTTCTCAGGCTGGCTCTGTCTGCCCTCTTGGGATCATGGAATATCCCATCTATCCAAAAGAAGATAGGCAAGAGTTCGAGCCAAATGCAACTCAACGG  
AAGTGACCTTCTCCTCAAGCCACAGAGACTTGGCACCAGGCAACAATAACATCAATTGTGATGCTACCCAGGGCTCACAACAGTCTGGTGCCTGAGACTA  
GTGCATGTGATTCTGAGGCAGGATCTGGTGCCAGGCTTACAGCTTTCAGCCTGCCTAAGCAGTGGGAAATGGT

cg01828798 (Speichel 10% (16%), Blut 66% (5%), Sperma 91% (2%))

**cg04351468 No cutting site HhaI**

ACAGATTGGGATAATGTTGTTTATTTATTTTATTTTATTTTATTTTGTAGACGGATTCTTGCTCTGTTGCCAGGCTGGAGTGCATCA  
GCGT  
GATCTCGGCTCAC  
TGCCACTCTGCCTCCTGGGTTAACTGATTCCCCTGCCTCAGCCTACTGAGTAGCTGGAATATAGGCACACACAACCAGACCG  
AGCTAATTTTTTGTGTGTG  
TGTTTATGAGAGACAGGGTTTACCATGTTGGCCATTATGGTTTCTTCTCCTGACCTCGTGATCTGCCTGCCTTGGCCACCAAAGTGTGGGATTACATCCGT  
GAGCCACCATGCCCGG  
CATGATTGGGATAATGTTACAAAGCAAAAAAGCACTAAAGAGCACAGAATGGAATGCTCTTGACTACAATGTAAGGAATCAATAA  
TTAATATAATTACATAAAAGTTAAAGCTTTAGTAAACACACAATCTCTAGATTTAAGACTCAACAGGACAAGAGACCATTGGTTGAATCAAAAAGTCTCCTCA  
ACACTGGGAAATGAGTAATTAGCTATTCATGTTACATAAATCACTCTGGTGACAGGAAAGAAATGTCCTTA

cg04351468 (Speichel 9% (14%), Blut 90% (2%), Sperma 92% (1%)); RBMY1A3P

**cg14442616 No cutting site HhaI**

ACCTAGGCAAACGGCATGCTATCAACAAGAAAGGTTTAAAGCTTTGATAAAATGGGGGAGATTTAATCAGTTTTTTAATGCCTGCTATAAAAAATTTGAAATATTA  
GAATGGCCGACCATGGCAGTGACCAGGCCTCACTACAGGCCTGGTTGGATTCTGGTCTTTAATGCATGCTAGTGTTGATGTTTTTGGTCAAGAACGGTTTAAA  
CAGGAAGGATTGTGCAGCAGGCTTTAATTTAATGTAGATTCACTACTGCTCTGTTAAAGCTGCATTGAAATGTTAAATGGCTTACACTTGCAGACTTGCAGAAATC  
TTAAGACTAACAAATCCTTGAATCACACAGCTTCAAATACGACTAAACTGCACAAGGTGTGTGTTCTATATGTGCAGTTTTAATGCTTTAGTTGATAGG  
TTCCATGGTATTTATAGTCTCTTGTGCTAAATTTGGCCAAAGATGATTGTCCACCCTAAAAATGCCTCTCCCACTTGGAAATCTGTACTGATTTTGTGCCAGA  
TGCAATGATCTTTAAAAACAAATCTTTTCAATGGCATAAGAAGTTGACAAAAATTTCTAAAGTGAATAGATTTT

**cg14442616** (Speichel 7% (11%), Blut 94% (3%), Sperma 92% (2%)); DDX3Y (DBY)

**Blood**

**BL\_Y\_I cg03416979**

ACAATTACAGGCTTTACAGAGGCCAACTGAAACTCAGATTATTTACGGCCCCAGACTTCTACATAAACTAATACAATTTATGTCAAATTTGGTAATTCC  
CGTCAAGCAAATCAGACATGTGACATGCGCTGACTAAAAGTATAAGTTTTAATAGCCTTGGTTAAATATATTGCCTGTATTTGAAATGATGACCACATTCACAG  
AGAAAACCCTGTTTAAATAAAAAGTGCACATGGCGCTTAGCACCATCTCCCACTTGCACATGTCCGACATATCCGACAGTTAAAGGTAGAATCCTCAAG  
AAAATTAATGAGTTTAAACAAAATGAGTTTCTAATAGCACTAAGGAGTTCTCTCCCACTGTCTCTCTCTATAATTCAACACCCTC

**cg03416979** Blood 91%, saliva16% (max 60%), sperm5%

**Blood\_Ychr\_I forward:** TM: 64°C, Länge: 22 bp

**Blood\_Ychr\_I reverse:** TM: 60°C, Länge: 20 bp

Tested by MTA students Primer Blast>> viele matches bei 199☺ nochmal neue Primer

**Primerpaar 2**

Blood\_Y\_I for\_neu

ACCACATTCACAGAGAAAACCCT

Blood\_Y\_I rev\_neu

CGACATGTGGGCAAGTTGTG

**BL\_Y\_II cg14029254**

GTAAGCTCTCTCTAGCTCCGATTTATCTGCCTCCATCCTTTGAAGAAGGGCCTTCCATCTTGGAAGCTTTTACTTTTCGGGTACCGCTGCTTGGCGGG  
TGGAATGCTGCTGGTCTGCTTCAAGAAACCCGATTTGGAGAGCGGAGGTCTGAAGAGTGCAGCTGGGGTTCCGGGCTGGCCCTTGTGCTCGGCCTGG  
GCGCCGGTGGTCTGTTGGCGAGTCTTGTAGGAATAAGCTTCTCGGCTAACCTTACAAGTCCACCCTTGACTCCGACGCCAGACTGGCTTTTT  
GGGTTAGCTTATATCCATGTAAGCAGTCTCAGATTGCTTGGAGAGCACTGTGGTGTCTTACAGCAGAGAGACTCG

**cg14029254** (Blood 89%, saliva11%, sperm3%)

**Blood Ychr II Forward:** TM: 66°C, Länge: 20 bp

**Blood Ychr II Reverse:** TM: 64°C, Länge: 19 bp

**BL\_chrY\_III cg08265308**

GCTCTCGGGTCTGTGCTGAGGATAACTCAGCTCCGCCCTCGCAAAGGCAGACAAGCGAGCGCCGACAGCAGCTCAGACAGCGCTGGCGCGCGGACA  
GGCGCACAGAAGACCTCAGGCTCAGGTTCCACTCCCACTGTGAAAGGGTAAGAAGTGAAGGTTGGCTGAGGCTGGGGGTTGTTCAAGGCGGGGTGGGCTC  
TGGACCCAGCAGCCCTGCACCCAGGCCAGGGCTTCAAGGGAGGCCAGGTAAGGCCAAGATGGGGCCGGGGCTGGTTCAGAAAGATCGAGCGTTGGGAGC  
CGGTGGAAGAAAAGAAGCGCGCGGGCGACAGTCAAACAGGCCTTGGGGCAGGGCACGCTCAGCGCTCCAGGCAGCCCTGCCAGCCAGGGCACCTGAGCAGG  
GACCGCGCTGCACTGGCGCGCCAGAGAGCTGCTACGGTGTGTTTCTCCCTCGGGCTGTTGGCGGGGCCGTTATGGTGCAGGCTGCTGCTGGTCTCTAA  
TGGTCTCTTGGCTTCTGCTGAGAGCGGGAGCGCGTGAGAGTCTGTGCAAGGTCCTGGACAGACTGCATTGCTTGTGCTTCAAG

cg08265308 (Speichel 4%, Blut 90%, Sperma 2%)

cg21106100 (Speichel 24%, Blut 82%, Sperma 3%)

BL\_chrY\_III\_for TM: 62°C, Länge: 19 bp

BL\_chrY\_III\_rev TM: 62°C, Länge: 20 bp

BL\_Y\_III\_for\_A TM: 64°C, Länge: 21 bp

BL\_Y\_III\_rev\_A TM: 64°C, Länge: 19 bp

BL\_Y\_III\_rev\_B TM: 64°C, Länge: 21 bp + BL\_Y\_III\_for\_A

#### BL\_chrY\_IV cg10363397

TCGTGTTCCAGGGT GCGTGTAT GCGCGT GTTGGAGGGTGCAGGTGGCTCC GCGCGCCTCATTTTCGAGTCCCTAAAGATTCAAGGTCTGTACTACTA GCGTAGAGCGG CAGAGAAGTGCCGGGGACAGG GGATTTGGCAGGACGGTGT TTGGAT GCGC CAGAGACAGGCTCCAAGGTCACTGTCCCCAAACCCCACTTACTAGGT TCTTTTAGCCGGCAGTAGAGGAGTGTGTGTGT GCGCTTGGTCGCGTGTGTGGGAGTCTACGGGAACC GCGCGCTTGGCTCCTGAGGGTTGCC CGGACCCTGC CCCGTGGCATGGACCCCGGGGGCT GCGCGGAGGCTCTGGGTGCGGGTGGGCACACTATGGCAGGTTTCGACTCAGGGGGTGCAGAGTACAGTCTGTG CCTCTCCAGCCCTGTGCAGC GCGGAGTTCTGAAACCT GCGTATATTTTTCACTCTCCTGTATTCTTACCTCTGTCTGTAGGTGCCCA CCTGTTCCAAGTTTC CACCGTCTC GCGCTCAGGGAAATTTGGGGGGACCAAAGGAGAGGTAGTGTCTTGTAGGAAGGCTGGCTTCTGGCTGGCGGG

cg10363397 (Speichel 12%, Blut 94%, Sperma 1%)

BL\_chrY\_IV\_for TM: 64°C, Länge: 21 bp

BL\_chrY\_IV\_rev TM: 64°C, Länge: 21 bp

#### BL\_chrY\_V cg09460641

CTGCCTAACGAAGAGAGATGTTTTGTGTGTTTCATGACACATAGAGATG ATCATGGCTTGCCACTCAGGATGTCAGGGCACAGGGCTACCATGCCACAATTC CAAAGACC GCGTAGCC GCGTGTGCTGGACTCTGAGTACCCGGCACAAGTCCAAGGGCTTCTCGGAGGAGGCT CGGGGACGGAAG GCGTGGGGTGTGAGT GGGCTGGAGATGCAG GCGCGCC CGTGGCTGTGCAGCCAGGGAG GCGCCCGCCCTCCATTGATTGGCCATGAGGGGAAGGAAGTCCGCTGGGTGCGG CCCCTTGGCCCTTAGCGCGCAGTCCCTTAGGGGTCTCTGGAACCCG GCGCATGCGGCCCTGAGGGCCGCTGACCCACCGGGTGCC CATCTGCGACAGGGT TCCTATGGCGTGGGTGGAGCAGCAGGCCCTTGGTGTGTGCGGTGCCGAGGAGGGCACTGCCTTCAGGATGGAGGCTGTACAGGAGGGCGGGCCGGGGT GAGAGTGAGCAGGCGGCTTTGGAGTTGGAGGCAGTGTGTTGGCAGATGACATAATGGCGGAGGTGGAGGTGGTGGCCAGGAGGAGGCC

cg00455876 (Speichel 13%, Blut 79%, Sperma 6%)

cg09460641 (Speichel 14%, Blut 96%, Sperma 5%)

BL\_chrY\_V\_forA TM: 64°C, Länge: 21 bp

BL\_chrY\_V\_revA TM: 64°C, Länge: 21 bp

BL\_chrY\_V\_forB TM: 66°C, Länge: 20 bp

BL\_chrY\_V\_forC TM: 64°C, Länge: 20 bp

#### cg00050873 unspecific

CTGGTCCCCAGGGGACTCAAAGTACTGACTCAGACACTGGACTCCTCCACAGACCCAGGCTCCCCAGCTGACTGCAAATCCATC GCGTAGCAAAGCAGGACT TCCGCATGCTTCCGACCC GCGCGCATCTCGTGTGCAAACAATCTACTCT GCGCAAGAACTCTCCAGAGGATTGGGTGGCAAGCCTCGTG GCGCCTTGC AATTTGCAAGAACACAGACAATGTGGAACAGGGCCATCTCCAGACATTTGGCCAGTACCCTTATTGTTGGCCCTCTATCTGTCTGGCCGAGGAGGCA GCGACAAGTGTGTGTTTTGGAGTGGGTGGACCC GCGCAAGA GCGCTGGGCTGACCAAGACGGGAGGCAGAAAAAGTGGCAGGTGGTTGCAGCTGA GGGACGGGAGGGACCGGGGGTGGTGTGAGGCGGCTGCTTCTGGGTTTCTGAGATGCAGGAGGCCTTTGTGTGCTGGGTGCTGGACATGTCCGCTGATGT CCGGGTGTGTGGTGTCTTATCTAGTCTCCCTGAGGGGTGGGCTGTCCACTGAGGGAAGCCTTGTAGTTAGAAGCCACAGC

cg00050873 Speichel 11% (16%, max: 63%), Blut 89% (1%, min: 88%), Sperma 10% (4%, max: 22%)

cg03443143 Speichel 30% (19%, max: 73%), Blut 92% (2%, min: 90%), Sperma 8% (4%, max: 25%)

sequence not specific

**cg14005657 not tested**

TCGCCCTGCTGAGAACCTGGTCCCACACCTACGGTGGACCCAGGTTTCTGAGGAGCTCCGCTGGACCCGAGATCCCGACTGGCCAAAGGGCTCCGGTCCCCA  
GCAGGCTCAACTGCGCACAGGAGCTCGGGAGCCAGAGGCCCGGCCCTGGGCTTGCAGAGCCCCACCAACAGGCACCCGAACCGCTGCTGCGGGTGC GGGA  
GCCTTGGGTGCTCAAGGCA GCGCACACAACGGT GCGC GCAGGCCGACAATGGCCAACCCTGGCGGCTGGCCTCTGGTGTGCCAGGGCATAGGACAAGAG  
GCCCTTGGAAATGCTCCTTGGAGTACAGCATCCTCAGGGAGGAAGCATGGTACTCGAGCCTCTATTTGCCCTCGACCTGTGAGAGTGTGTGCCGGGGCTCTGG  
CCTTACAGCAGATCAATCCACCTCAGCACCCGGCAGGCGACTTTCCTCCCGCGGCCCGATCACTTCCCCAGGACACCCCTGCCCTTGGCCCCAGC  
AACCAGAGAGAGTTCTCTGCATCTGCTGTATTACCTCCGTACCATCTACCTGGCCTGCCTAACGAAGAGAGATGTTTCTGTGTTC

cg14005657 Speichel 12% (16%, max: 56%), Blut 75% (1%, min: 74%), Sperma 5% (1%, max: 9%)  
cg09350919 Speichel 19% (19%, max: 73%), Blut 97% (0,3%, min: 94%), Sperma 11% (2%, max: 22%)

**cg04016144 not tested**

CTGCGCAGCCCAGCCCAGCCCAGCCCATGCCCGCACCCGTAGGCTCTGGGGGCCCGCTCCCAGCAGACCCGCTCCCTGCAAGACCCACGGCGCCCTG  
CTGTGAACCTGGTCCCACACCTACGGTGGACCCAGGTTTCTGAGGAGCTCCGCTGGACCCGAGATCCCGACTGGCCAAAGGGCTCCGGTCCCAGCAGGCT  
CAACTGCGCACAGGAGCTCGGGAGCCAGAGGCCCGGCCCTGGGCTTGCAGAGCCCCACCAACAGGCACCCGAACCGCTGCTGCGGGTGC GGAGCCTCTGG  
GTCGTCAAGGCA GCGCACACAACGGTGTGTGCAGCGCGACAATGGCCAACCCTGGCGGCTGGCCTCTGGTGTGCCAGGGCATAGGACAAGAGGCCCTTTGG  
AATGCTCCTTGGAGTACAGCATCCTCAGGGAGGAAGCATGGTACTCGAGCCTCTATTTGCCCTCGACCTGTGAGAGTGTGTGCCGGGGCTCTGGCCTCTACAG  
CAGATCAATCCACCTCAGCACCCGGCAGGCGACTTTCCTCCCGCGGCCCGATCACTTCCCCAGGACACCCCTGCCGCCCTA

cg04016144 Speichel 14% (19%, max: 90%), Blut 95% (1%, min: 93%), Sperma 9% (9%, max: 42%), TSPY4

**cg06322277 No cutting site HhaI**

TGGCCCTAATTCAGAAAAACGAATTGTTTCTTAAATCATGATTTTACAATACAACATGTCACAGTCAACAAGGAATCATACAGGTTATTTCTTAACGATTGGCTTTT  
TTTTTTTTAAGGCGGCTAAATCCTGCTCCTCAGAGCTTCTGTTAAATATTTTTAAAGTTGGCGAAAGATAATTTTTAGAGTGAAACTCGCTCCAGCTTAG  
CCGACCTGAGGGGAGGAAGCACAAACAAAAGTCCCGTGGCATAACTGACACCTATGAATCAGTATCAGAACTGAATATGCTAAGAACTCAGTTCAGGCTG  
TGACCTTACAACGGAAGAATAATAGTTGTTACCGAGGCGGAATCTGGAATGAAATTCTCACTATTTGACTTCCCGCTGTTTATCACCGCAGATTACGGT  
TGCACCGTAAAAGGAGAGGTTCTGTTCCGTCGCGGGATTTCCGCATGGTAAGCGCTGCGTCTAGCTCCGGATTTATCTGCCTCCATCCTTTGAAGAAGGGC  
CTTCCATCTTGGCAAGCTTTACTTTTTCGGGTACCGCTGCTTGGCGGGTGGGAATGCTGCTGGTGTCTTACAGGAA

cg06322277 Speichel 14% (15%), Blut 96% (1%), Sperma 1% (1%), RPS4Y2

**cg15935877 not tested**

TCTGCCACCCCGCGGGCTCCACCTCAACCACCACCTCCACCTCAGCCATGATGCTTCCACCTTCCAGCACCGCTCCTCTTCAAGGCCGCTCCTTGTCTGT  
ACCCCGGCCGCTCCTCAGCATTGCCTCAGCCTGAACACGGTTTTCTCTGGGTGCTCCACAGACCCCTGGGCTGCGCAGCCCAGCCCAGCCCATGC  
CCCGACCCGTAGGCTCTGGGGCCCGCTCCCAGCAGACCCGCTCCTGCAAGACCCCGCGCTGCTGTGAACCTGGTCCACACCTACGTGGACCCA  
GGTTTCTGAGGCGCTGCGCTGGACCCGAGATCCCGACTGGCCAAAGGGCTCCGGTCCCCAGCAGGCTCAACTGCGCACAGGAGCTCGGGAGCCAGAGGC  
CCCGGCCCTGGGCTTGCAGAGCCCCACCAACAGGCACCCGAACCGCTGCTGCGGGTGC GGAGCCTCTGGGCTGCAAGGCA GCGCACAAACAGCGT GCGC  
AGGCCGACAATGGCCAACCTGGCGGCTGGCCTCTGGTGTGCCAGGGCATAGGACAAGAGGCCCTTTGGAATGCTCCTTGG

cg15935877 Speichel 15% (12%, max: 60%), Blut 92% (1%, min: 90%), Sperma 5% (4%, max: 25%), TSPY1 (TSPY4)  
cg05544622 Speichel 16% (18%, max: 52%), Blut 98% (0,3%, min: 98%), Sperma 4% (6%, max: 30%)

non semen

**noSp\_Y\_I cg02288797**

TCTGAACTTTAAGAAGCAAGGCA **SCGT**CTTCCAGAGCTTGTAGTTAGGGCCGTTTCAGAACAGACTTCTCCATGGGCTTCCAGGCAGTGACAGGCTCAGACACTGCTATTGGGAATAGCCAATGCTATTCCGAAGAAACAAGCCATTGAGTTTCAGGACTATATTTTACAAAAGGAAACTGGTGAGAACCAAGGTCCCCTTCACTTGCTGTAATACACCCCTCCAGCAGCTGAGGCTGGTATCTCCATTCCTCCAGCCCCAGAGAGACTGGGCGAGGGAGTGAGGGGGAGACTTGGGGTTTGGGGCAATCCTG **CG**GTCAAAGTGGGGTTCTCCCAAGTGCAGACCAATCTCTACCCATGCCAGTAGGAACAGGCAGGCTGAACTGAAG **GAGCTTGAGCTACTGACCCG**ACATGGTCCGTG **GCGC**CGC **ACCG**AGTGG **GCGC**GGACCCGAGACCT **GCGC**CCAG **GCGC**AGTG **GGTGGAAATAAATCCTCGTCAG****GAACCCG**CAGAACAGAG **GCGC**CGTCTTTGGGAA **CCCGCGTGGATTCCAGGC**CTGGGGGCGACA **SCGT**GGCTGCCTCGACACCTCGGCTGCAGGCCT

**cg02288797** (Speichel 87%, Blut 87%, Sperma 9%)

**noSp\_Y\_I\_forA** TM: 64°C, Länge: 20 bp

**noSp\_Y\_I\_revA** TM: 66°C, Länge: 22 bp

**noSp\_Y\_I\_forB** TM: 64°C, Länge: 22 bp

**noSp\_Y\_I\_revB** TM: 64 °C, Länge: 19 bp

**noSp\_Y\_II cg04964672**

TACATGCTCACAGAGACATACAGGGGCATATACACAGACATATACATATGCATACACACACCAAACACACAGATACACACAGAACAGACACCGAGGCACACAGACCCACACCCAGCCACTCACCATCTTTGTAAGGGGAACAGTACTTTTCAGAGTCTTCAGACCTACTTACAGCCGCATCCCTCCTTACATGAACTGGATCCCATGCCGCGGATACACCCAGCCCTGTGACCATCAGAGGCCCTGTCTCCCTTTCTTGAGGGAGCCACCCCTACCTGGCTCTCAAACCTATTCTCTACCTGGAAAACATAAAGCTCTTATGACCGTCCACACCATCGTCCAGCAAGCCTACTGGACACACAACCCGACTTTA **SCGT**CCAGTCTCTCCGGAACCTCCCTAAAGGAATCTAAACAAGGACCACTCCAAGCCGCA **SCGT**G **GAAAGCCGC** **CGTGGTGCTAC**CAG **GCGC**TACCGTGGTCCGTCTACCATGTG **CGTCCACAGTCCGTTGAGACTC**CGGCAGGAAGCCTCGTCCCTGGCAGTAGACAGAGCCTTTTCCCAAGCTTTCTGGCTGCCGATCCCGCTGCTTGGTG **TCCACCCCTCTGCTTGGGAGGG**AGATGAGAGCCCGCCAGCGAGCTACCGCACATGGCTCTGGGTCCCGC **ACCG**TGGCCGGGAAAGGAAGCACCTTA

**cg04964672** Speichel 62% (8%, min: 54%), Blut 84% (12%, min: 60%), Sperma 3% (5%, max: 25%)

**Sp (-)\_chrY\_II\_for** TM: 66°C, Länge: 20 bp

**Sp (-)\_chrY\_II\_rev** TM: 64°C, Länge: 20 bp

Produktlänge: 71 bp, 1 Schnittstelle, keine Nebenprodukte

Sp-**\_Y\_II\_lalu\_r**

PCR Produkt: 153bp

**noSp\_Y\_III cg07728631**

CACTACCAGG **ACGT**CACCGTCTACCTGGGAGACACCATTACAATGGAGTGTCTGGCGAAAGGGACCCAGCCCCCAAATTCCTGGATCTTCCGTGACAGGAGGGTGTGGCAAACCTCTGTCTCCGTGGAGGGCCGGATCACCTGCACAAACCCGACCTTTCCATCAAGGAG **SCGT**CCTTCTCAGACAGAG **SCGT**CTATAAGT **GCGT****GGCCAGCA** **ACCG****AAACCCG**GGCGGACA **SCGT**GTCCATCCGCCTAC **ACGT**GG **CG**GCACTGCCCCCAATTATCCACCAGGAGAAGCTGTAGAACATCTCGCTGCCCCGGGGCTCAGATTACATTACTGCACTGCCAAAGCT **GCGC**CCCTGCCAGCGT **CTCTGGGTGCTCGGGGAT**GGTACCCAAATCCCGC **CCCT** **CGCA****TTTCTCCACCG****GAAC**TTGTTTGTTCCTCCAAACGGG **ACCG**TCTACATCTGCAACCT **CGCG**CCAAGGACAG **GG****GCGC**TATGAGT **GCGT**GGCCGCCAACCTGATCGGCTCC **GCGC**GCAGTACGGTGCAGCTGAACGTGCA **GCGC**GCAGCAGCGAACGTGCA **GCGC**GCAGCAGCGAACGTGCA **GCGC**G

**cg07728631** (Speichel 90%, Blut 84%, Sperma 6%)

**cg05213048** (Speichel 65%, Blut 71%, Sperma 7%)

**noSp\_YIII\_forA** TM: 64°C, Länge: 19 bp

**noSp\_YIII\_revA** TM: 64°C, Länge: 20 bp

**noSp\_YIII\_forB** TM: 66°C, Länge: 20 bp



noSp\_YIII\_revB TM: 64°C, Länge: 19 bp

Sp-YIII\_la\_f TM 64°C,

Sp-YIII\_la\_r (reverse primer not Y spezific), TM: 64°C

CAAATTCCTGGATCTTCCGTGACAGGAGGGTGTGGCAAACCTGTCTCCGTGGAGGGCCGGATCACCTGCACCAAACCGGACCCTTTCATCAAGGAGGC  
GTCCTTCTCAGACAGAGSCGTCTATAAGTSCGTGGCCAGCAACGCAACCCGGGCGGACA SCGTGTCCATCCGCCTACACGTGGCGGCACTGCCCCCAATTATCC  
ACCAGGAGAAGCTGTAGAACATCTCGCTGCCCCCGGGGCTCAGCATTACATTACTGCACTGCCAAAGCTGCGCCCTGCCCA SCGTGCTC

Sp (-)\_chrY\_III\_forA TM: 64°C, 19 nt

Sp-YIII\_Glu\_rl TM: 66°C, 22nt

Sp-YIII\_Glu\_rll TM: 64°C, 20nt

Sp-YIII\_Glu\_rlll Tm 64°C, 22nt

Sp-YIII\_sma\_for TM 64°C, 18nt

## SmaI / GluI Digestion

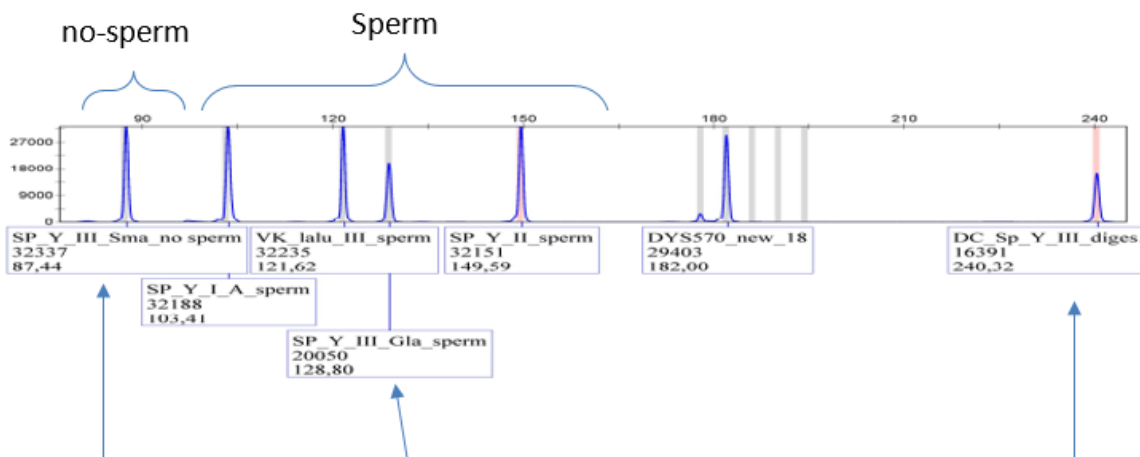

Not a real digestion control, will be cut by either SmaI or GluI.

TGGCGGCACTGCCCCCAATTATCCACCAGGAGAAGCTGTAGAACATCTCGCTGCCCCCGGGGCTCAGCATTCA  
CATTCACTGCACTGCCAAAGCTGCGGCCCTGCCCAACGCTGCTCGGGTGTCTCGGGGATGGTACCCAAATCCGCC  
CCTCGATTTCTCCACCAGGAACTGTTTGTTCCTCCCAACGGGACGCTCTACATCTGCAACCTGCGCCCAAGG  
ACAGCGGCGCTATGAGTG

noSp\_Y\_IV cg23834181

AGGTCGACTAGGGAGATTGCCCCCTAATGGTATTTACCTTAGACCTCGGTGCTTGAGCTGTAATCATTCTAGAACTACTCTTAACCATGTCAATTATCCACAA  
GTGTGTTTACTCAGTTTGTGTGTTAATTGTATACGAAATAAATGCCTGGAGTGCCAGCTGCTCAGGGCCGCCGAGTGACAAACCTCTTGGTGTGCAGGCG  
GTCGGACACTCAGCTGGACAGGCAAAGCAGAATACCTTCTGTCAAGTACGTTTCATTACATACATCGTTTGGGTGAGGGTCTCCGCCAGATACCCGAGCTA  
ATGCCCTCAAGTGTGAGGTGCAACACCTCAAGGCTGGGACCGCTCAAGGTGCAAGCTGGGTAAAGAGAAGAGAGGACTGAGGTCCGGCCCCACC GCGCTC  
TGTGTAGAGGACGAAAGCCAGCGCGGGCCCGGTGTCCCAAGGCACC GCGCTACGTGCCAGGTCCCAACATAGGGCGACCGGAATCAGGTGTTGGG  
GCCGCACAGACTCCGCGACCACTGCACCACATCGGCCAGCCCGCTG SCGTGTGTTGACGCTCACTTTGGGGCCGGTCTC

cg23834181 (Speichel 68%, Blut 71%, Sperma 7%)

cg25667057 (Speichel 23%, Blut 83%, Sperma 8%)

noSp\_Y\_IV\_for TM: 64°C, Länge: 21 bp

noSp\_Y\_IV\_rev TM: 64°C; Länge: 20 bp

**cg27539833 No cutting site HhaI**

ACCCATCATTGGCCACAAAACGGGCAAAGATGCCATGCCACCCACCTGCAGAGCACCGAG **BCGT**CTGTGCCGGCCAAGTCAGGGCCAGTGGTCCAGACAAT  
GTACAAAGCCTGCCCTGTGGCCCTTGCCAAAGGGCCAGATGTCAAGAGAGAAGCAACCAGATCCGGAGTCGGCCCTAGCCAGAAGCTCACCGGAATAGCC  
CAGCCAAAGAAAAGGTCAAGATTTCTATCACTTCCCCGTCTTCCAGAACTTGTGTCTCCAGAGGAGT **ACGC**CGACTTCAGCAGCTTCTGCTGCTAGT **CGAT**  
GCAGCAGTACAAACGGCTGCCGAGCTGGAGCTAGAGAAGAAGCAAGAGCCTAATCCATGATTGATGATGTTCCAAAACCCAAGTAGTCAGTCCCTTGTGTAC  
TGTGGTAAACCTGTTTATGTTACCCCAACTATTGTTATGCTTATCTTTTATAGAGGCATCTTTCTTCTACTGGTTTTATGAGTACCAATCTTAATTATTGGGACT  
AAATTCTGTGAGATTTTCAAGTGTTCAGGTGAAAGACACTAAGGTGCCATCATAATGAACACTGCAGCAAAGATTTCTTAACCTCCTTCTCCTGGATTGAA  
CTCTTAGACCATCAGACTAGTACATCTGAGATTAACATCAAGCTGAGATTTAGAGATAAATGTTTTGGCT

**cg27539833** no, saliva 92%, blood 93%, semen 6%

**cg01053349 No cutting site HhaI**

AGTGAGCCGAGATGCCGCTTGTGCCACTGCACTCCAGCCTGGGCGACAGAGCGAGACTCCATATCAAAAAAAAAAAAAAAAAAAAAAAAAAAGACAAAGACA  
AAGATTTTAAGCCATAGAGAAGAAAATTTAAGCAGCAAGGCATCAAAAGCAAAGTCTAGTTCAAAATTATTATTAATATCTGCTTTGAACATGGAAGAATG  
GAAGAGGGGAGTCA **ACGT**ACAGTAGTTACTCTTTTATTGAGTTTAGTAGCTAATCAACAATTTGTTCTGATATATCTAGATGAGCCAGTGAGACAATTATAA  
GTAATAA **CG**GGAAGAACAATACCAGAGTAAATCAAATAGGAAGAAAGTGATAG **BCGT**ATTACACTAATAGAAATAGAGTCCGTCAGTTAGTGAAACTGG  
TGACAAACAGCAGAGAAAACCTGGAGAGCTATAAACT **BCGT**GAAATGAAGTGCATTGGAAGTTACAGAAAAT **ACGC**AAGAACAATGGGAGAAGAACTCCAG  
AAGTGTAGGGGAGGGGCA **BCGT**GGAGAAGAAAGGATGTG **ACGT**CACTGAGATAACCAGCTCGGCTGTAGCAACTCTGTAGCAAA

**cg01053349** no, saliva 84%, blood 87%, semen 5%

**cg03515901 No cutting site HhaI**

GACAATTATAAGTAATAACGGGAAGAACAATACCAGAGTAAATCAAATAGGAAGAAAGTGATAG **BCGT**ATTACACTAATAGAAATAGAGTCCGTCAGTTAG  
TGAAACTGGTGACAACAGCAGAGAAAACCTGGAGAGCTATAAACT **BCGT**GAAATGAAGTGCATTGGAAGTTACAGAAAAT **ACGC**AAGAACAATGGGAGA  
AGAATCCAGGAAGTGTAGGGGAGGGGCA **BCGT**GGAGAAGAAAGGATGTG **ACGT**CACTGAGATAACCAGCTCGGCTGTTAGCAACTCTGTTAGCAAAGCTG  
TTTGTCTTTCT **CG**GAAACAACAGGTGAGAATTTCCCTTACAGACCTGCCATGCTTTCTAAAGTGGCTCTCCAAACCTACCTTTGTCTTAACCTCAGTTGTCTGTG  
ATTCTCAATATAGTAACGATAAGCCTCTTTGAATATGGAGGCCGCTGCAGACGCCCGGCTGAGACCCAAAGCCGGTGGA AAAAGACAGCCCGCGGAAGAC  
CCAAAGCCAGCCCAAGACACCTCAATCATGTGAGAAATA **ACGC**AGATACAGGCAGAGTCTTGCCTTACCAGAGCACAAGAAGAAG

**cg03515901** no, saliva 89%, blood 90%, semen 4%

**cg04477336 No cutting site HhaI**

CTGTGAGAGAAGACCAATTTGCTTTGTTGCGGATTTCTAACTGGTTTATCAATGCTCGCAG **ACGC**ATTCTCCCGGATGCTTCAACA **BCGT**AGAAACGACCCC  
ATCATTGGCCACAAAACGGGCAAAGATGCCATGCCACCCACCTGCAGAGCACCGAG **BCGT**CTGTGCCGGCCAAGTCAGGGCCAGTGGTCCAGACAATGTAC  
AAAGCCTGCCCTGTGGCCCTTGCCAAAGGGCCAGATGTCAAGAGAGAAGCAACCAGATCCGGAGT **CG**GCCCTAGCCAGAAGCTCACCGGAATAGCCAGC  
CAAAGAAAAGGTCAAGATTTCTATCACTTCCCCGTCTTCCAGAACTTGTGTCTCCAGAGGAGT **ACGC**CGACTTCAGCAGCTTCTGCTGCTAGTCTGATGCGAG  
CAGTACAAACGGCTGCCGAGCTGGAGCTAGAGAAGAAGCAAGAGCCTAATCCATGATTGATGATGTTCCAAAACCCAAGTAGTCAGTCCCTTGTGACTGTG  
GTAACCTGTTTATGTTACCCCAACTATTGTTATGCTTATCTTTTATAGAGGCATCTTTCTTCTACTGGTTTTATGAGTAC

**cg04477336** no, saliva 92%, blood 91%, semen 5%

**cg17115812 No cutting site HhaI**

CTGCAGAAAGGCACTATCGTCCGTGGGAGGACTCCAGCCTTACCCTTTTTCTCGGGCTGCCTCAATGCTCCTTACGAAGACTGACATGCTCTCCCTTC  
CTTCCGGGGCTTTCTTG **ACGT**TTTGGTTATCCCCGTGGGCGAGAA **ACGC**ACCCTGAGTGCACACCAGGTATCCACGGTCCCTCGGTTCCG **GCGC**CAGAGGCTGC  
TGGAAGACACTGTCGTCCGTGGGAGGATCCCTGCCACCGCTTTTTCTGTGCTGCCTCAGAAGTCTTCTTTCAAGCCTGGCATCTTGTCCCTTCTTTAGGG  
GCTTTCGTGTTGCTTTGAGATGCCCTTGG **BCGT**GACCG **CG**CAGCTGGGTGCAAGGCAGAAGCTCCACCCTCGCTGGCCGGAGCAGGGTCTGCCAGGAAG  
GCACTGTTGCCATGGGAAGTTTTCTTGTACTGTCTCA **ACGT**CCCCTTCAAGCCTGGAGCTCTGTTCCCGTCC **CCCGGG**GGTCTTCTGCCGCTTTGAAGTGC  
CCCATAGGCCTGACACGGACCCTGGGTGCAAGACAGGGACTCCACGACCACCCCGGCCCAACACAGGGGCTGCC

cg17115812 Speichel 74% (10%, min: 48%), Blut 78% (8%, min: 58%), Sperma 6% (2%, max: 11%)  
cg14151065 Speichel 13% (20%, min: 0,3%), Blut 86% (3%, min: 80%), Sperma 5% (2%, max: 9%)

**cg26520468 No cutting site Hhal**

CACCCCCGCCTGGGAGACAGACAAAACCTATCTCTAACAAATGAAATAAACATAAAAAAAGCTTTAAAAACACTAAAACATTCTACCTTCTACACTTGCTTTT  
GCTGTCTGGGTGATAAAGTGGAGACTTAGATTAACATAATTTGCTCATTGAGCATTATCAAGAAGGCACAGTTTATGCCAAAGCTTACTATGTTAATTTTCTCC  
AGGAGTTCTTATGACTCCGAATACCAGGATACAACGGTTTGAGGTTCTCAAGAACGGTACCTTAGTATAAGGAAGTTTCAAGTGCAAGATCGAGGCCAGTAT  
ATGTGCACCGCCAGCAACCTGTAACGGCTGGACAGGATGGTGGTCTTTCTCTGGGTACCCTGCAGCAACCTCAAATCCTAGCCTCCCACTACCAGGACGTCAC  
CGTCTACCTGGGAGACACCATTACAATGGAGTGTCTGGCGAAAGGACCCAGCCCCCAAATTTCTGGATCTTCCGTGACAGGAGGGTGTGGCAAACCTCTG  
TCCTCGTGGAGGGCCGGATCACCTGCACCAAACCGGACCTTTCCATCAAGGAGGCGTCTTCTCAGACAGAGGCGTC

cg26520468 no, saliva 96%, blood 96%, semen 9%

**cg23308414 not tested**

GCCAGAGATCAGGTGTCTCAGGGCGGTAAGGCCTTAGACACCCGAGTGATACCTGGCTGACACAAGAGCCTGGCCCACCATGCCGCCAGACTCCAGGCATT  
ACCGCACTCAAAGCCACGGCTGGATCGGGACAACCTCTAAGCCACTCCTCGCTGCTGCTCGGCTGCTCTCCCTCCACGGCAGCACTGTGGGCCAC  
CGCGTGCACCTTCTGCCGGCTTCAAGGGCTCCAGCCATAGCAGACAAGGCCATGCACTGGACCATCTCGCGCGCGCCCTGCTGCTGAGTGAGGACGCGCAGA  
GGTGTCCATCCGCTGCACAGACTTCGGGCTCTCTGGTGGTCTCCATTCTCCGACGGCTCAGGGCTCCCAAGGCTCATGAACTCCAAGCTTCCACCACATCG  
GGCTTGTGAGCTTGTCTCCAGGAGTCAGGGATACCCTTCTGCTCCTTGCACGGAGGGATTGTTTTGGTTCCTCGCCGCCCTCCTGCAAGGCCCTCCT  
TCTCTACCCACCCAGTGTGCCAGGGCTGCTCAAGGGTGAACAGGTGGCTAGCCCCATGGGCCCTTTCTTTACAACG

cg23308414 Speichel 77% (7%, min: 58%), Blut 75% (6%, min: 65%), Sperma 11% (2%, max: 18%)  
cg10252249 Speichel 36% (22%, min: 0,2%), Blut 98% (1%, min: 97%), Sperma 5% (2%, max: 14%)

**semen**

**cg00035864 No cutting site Hhal**

AAAGTTGGAGTATCCACCTGAACACTGGGCCATGGTGTGGACTGCTTGTGCAACTAAGAGAATGTGGGGATGCAGTTTAAAAACACCTCTGTTTCACTGTCTT  
AACCTTTTTGCTGGTGAAGGTACAGGGCCCATCAACCCCTACCAAATTATATTTTACCTGTTTGACCTATTGCAGCTCACAATCTCTTTCCAGTTTGAAT  
CCAAAGATGATGGAGGAGTCCCGCTCATGATGTGAAGTACCTGCTCAGCTGAAACCGAATTTGAGATAAATTAAGGGTCTATGTGGACAAGACTGCTAGT  
GTCTCTCTGGATTGGTCATATTGCAATGAAACACCAGACGATGTCTGTTCTGGGTGTTGTATTCACTCTTTTCTAGAAGAGTGCCTTATTTGCAGGGGA  
AGATAATGGAGACCCTGGCTGGTCAACTAGCCTACCTGTTTATTGTGGATTATGACCCACAGAAACATAAAGAACAGGGAGCCACAGAGCCACAGCCC  
AAGTACAGCCACACAGACAGGCCACCAAAGGTTAAGACGCTAAAAAATAAAAAGCCCTGCAGTGTGTTAGCCACATT

cg00035864 Speichel 14% (19%), Blut 24% (2%), Sperma 77% (4%)

**cg00479827 No cutting site Hhal**

TGTAAGTAATGGAGATTATTCTATGTGATCTTAGTGGGTCTGACTCTGTTAGCAAAAGGCATTAAGAATAGAGGTGCAGCTTCCCTGGCTGGAGAAGATTCTG  
CTCATGGACAGGAGCTTCCACTCACTTCTGAGAATCCAGCTAGCGTTTCTTGCCTTATAGATTTAGGAATGCCTCATCAGTCCATGATCACATAGCCAATTCC  
TATGTCTTCTTTTCTATCTCCATTGCCCTTCTGGATTACCTGAACTGACACATTCACGTTTCGTAATAATTTACTGCGAAAGTCTTACCGTCTTGCAGCTTCTTTG  
CAAACTGTAACCTCCCAAACCAACCTTGCAGCTCCATTTTTTAAAGTAAATGTTTCTTTTTCATACTTTGTTCTTGTGGGAGGATACATTGAGATGTGAA  
ACATTGTGTTTCAAATGAATGGGGGATACGATTGACTATGTCCCGACCAAACTCATTGTTGAAATGTAGCTGCCATAATCCCTACCTGTTGTAGGAGGGACC  
CAGTAGTATAACTAAATCATGGGGGAGATTTCCATTCTGTGGTAGTGAATAAGTACAAAAATATCTGA

cg00479827 Speichel 12% (17%), Blut 33% (7%), Sperma 86% (4%)

**cg04817258 No cutting site Hhal**

AACATTCTCAAGGATGTGTGACTCTGTGTCTGTGTGTGTGTGTCTTTGTGTTTGTGTGTGTGTGTGTGTGTGTGTGTGTATGTTTATCCACTTTATTCGGGTGT  
CATAATGAATTGATCAATCCACGTGCTTTATTCTCTTCATGAAATAACCAGTCTGCGTGGAGCTGGGCCTCTAAAGTTGTAGAGTGAATGGGTGTGGGATG  
GTTGGGATTCTTCTACAGGACAGAGTGGGAGAGGTAAAAGCAAAGACAGCTTAGTTGGAGGCTGACTTCCTCTATGGAAGCAGAGATAGTTCAAGGAAT  
GGGGTACTGGGTTCCAGGGCCAGTTTGTGGGACCTCCAAATCCTTCATTTTGGGTATCATCATACACAGTAGCTAAGCACAGGATGATGGAATCTTAA  
AGTTGCTTTTGTGTTGAATCCACATGTTCTTTAAAGGTGAATGCATGATCCTTTTCTGGGACAATCAGCCTCTCAGGACTTCTAAAACATCAACGTGAGAAGA  
AATGGGCATGTAAGGTGTATGGAGGGACTGTGGGAAAGGTGACAGAGGCATGTGGGAAGGCATTCAGGATACGGTTTTTGG

cg04817258 Speichel 16% (21%), Blut 36% (1%), Sperma 74% (2%)

**cg25918849 no cutting site**

AGCCAGACATCTTTGCTAAAAATGCCTCTGGGGTCTCAGGTATGATGCTATGACCCAAAGAACCATCAACAACACACCAGACAGACTATATGCCAATCACCA  
TGGGACCCGATTCTTGCAGACACACATCTCTTTTGGGAATGGATTTCAAAGGGCAGTTTTTCACTGACCACCTCAGAGTCTTGAACACCTCATCTCCATCAGG  
ACACAACCACAGAGATGGTCCAAATGAGCCCTGAGGTCCAGGCTTTTATTGCTCTGCCATGGGTCTTACAGGCAGCCTTTTTCTTGATACCAGGCCAGCTCCG  
ACTGTACCATTTTCTCTGCTTAGGCAGGCTGAATGCTGTTACAGCAGGACACATAAGCCTGTCTCAGGAATCCACATAAGCTAGTCTCAGGGCACCAGTCTG  
GTGTGAATCTGTCTAGAGTACAGTGAATGCTACTGTTGCTAGCGACAAGTCCCCGCGCTTTGTGGAGAAGACTCCCAAGGAGGAGACCTCCATGGAGGT  
TCGTCGGCTGAGGTCTCTACCTGTCTACTCTGTGAGATCCACAGGATAGTCCATAATCCTAGGATAGGGAGGATGTGA

cg25918849 Speichel 17% (14%), Blut 31% (3%), Sperma 80% (2%)

**cg08921682 No cutting site Hhal**

AATAACTGTCTAACATACTTTCTGCCTGTGTTGGGCACTGCGGCTTAGAAAGTGAAGGCTTATAATTGTTTCTTCTGAGATGTGTGTGGTTTCAACACATGTCC  
TCCTTCAAAGTCATCCATAACAGACCTGGGTAATTGTGTTTTATTGACTCTCAGTCTTAAACTGGTTGGTAAGATTATGAGGAATGTTACATTAGGGGCGTTC  
ACCATTGAGGTTCTTAGGCAGGAAGATTCCACACCCAGAAGGGACTAGGCAGTTGTTCTCTGAAGTAGAGGTGGGAAAATCTGTTGTAATCCAGAAAGGACT  
AGAGCAGGCTCAGCAAACGTGGTCTGTGATGGACCTGATAGTAAGGGGCTTAGGATTTGTGGGCCAGGCAGTTGCAGCTGCTTTACTCTGCCATTGCATTATG  
AAGGCCCTACGGAGATGAATGAACATGGCTCAGTGCCAAGAAAACCTTTATTTATAGACATTGATACTGGGTTGCAGTTTGTGACTCTGACCTAGAGCAACACA  
CTGTTTTTTTTTCTTTTATGCTTTTTATTTTTATTTTAAAGTACTTGGGTACATATGCAGGATGTGCAGATTTGTATC

cg08921682 Speichel 15% (20%), Blut 53% (5%), Sperma 93% (1%)

**cg08593141 unspecific**

TCCAGAAGCTGAGGAAGTGGAGGTTGCAGTAAGCTGAGATTGCGCACTTCTACTCCAGCCTGGGTGAAAGAGCGAAACTCTGTCTCAAAAAAAAAAAAA  
AAAAAAAAAAAAAAAAAAAAAAAAAAAAAAAAAAGGAAGATGGGCCGGATGCAGTGGCTCAAGGACTGTAATCCCTGTACTTGAGGCAGGCGGATCATTTGAG  
GTCAGGAGTTGGAGACCAGTGTGGCCAACATAGTGGAAACCCATGTCCACCAACTCATGACACCGCATGTGGTGTGTTTAACTACTTGTAAAGGCTGGGCTA  
CAAGAAGTCTTAGGAAGACTCTTTTTCTACAGGGTACCCACACCTCCAACCTCTGCAAATGAGCCCATCCAGAAAGCTGTCTCTGGAGCACATGCCTGTTTCC  
ATCTTCTTGCACAGTTTCAGGCCATGTTAAGGATGGGAGAAGATTGCCTGGCCTCCAGCCTGGATGCCAGCCAGGTATGTGGACTTCAAGTATGAAAGCT  
GTCAGGCTTTGCCTCAGGAGAGCACAACTTATGCACTTGTGGTATAGGCAGTACTCAGATTCCCTGGGGCTGTGACCTGCTGT

cg08593141 Speichel 25% (21%, max: 65%), Blut 56% (4%, max: 62%), Sperma 92% (1%, min: 90%)

**cg05202434 no cutting site**

GCAGCCAATGCAACTCAACGGAAGTGACCTTCTCCTCCAAGCCACAGAGACTTGGCACCAGGCAACAATAACATCAATTGTGATGCTACCCAGGGCTCACAAC  
AGTCTGGTGCCTGAGACTAGTGCATGTGCATTCTGTGAGGCAGGATCTGGTGCCAGGCTTCCAGAGCTTTCAGCCTGCCTAAGCAGTGGGAAATGGTATGGGC  
AGAGCCAGCCTGGCATAGGGCAAAGGTGGCCTGTGAAAACCCACTATGGGACACTAACTTCTCGACCTCAGGGCCCTTCAGACCATTTACATGGTCCGGT  
CTCACAGGAGGAGAAAATATTTTGTGACTCTGAGGTGGTCACTGGAAAAGCTTCTTCTGACTTCATTTCCAAAAAGGCTGTGTGTGAGAATCTGGTTCCACAG  
AGATTGGAATATAGTACCGTATTGGAATTGTTGTGTTGTTGAAGGTTCTTTGGGTGATAGAATCATACCTGAGACCACATGTGTGGATGTCAGTGAAGATGGC  
TGGGCTTTGACCTACCATCTCCATTCATCTTGACATCACAGAGGCTTTCTGGGAAATGTAGGAGCCACGACGAAGGGGAAG

cg05202434 Speichel 19% (21%), Blut 52% (7%), Sperma 87% (2%)

**cg15781156 No cutting site Hhal**

TTCTCTGAATAGAATTGTGTTTATAAAACATAGCTCATAAATCTATTTGGCAAAAATAAGATATTCTTCAATATTTAGACATCTCTGCTGATTCATAACAATAACCT  
AAATTTTCAGTCTTCCGAACCTCTGAGAACATAACCTCTGATGTTACAAATTCTGGTTTTAGGGTTCAACAAGAGTCTTCGTAGCAAGTATATTAACCAACATAT  
GACTAGAGTAAAGGTGCTGTGGTTTCATGAGAAATAACAGCTGTCTCGAAGAGCCAGAAAGCCTGGAAACTTTCTTTCCAGATCAGATAGTTGACTACTCAA  
TCAGGGAAACGTTGAGTTCGTCATGCCTAAGAGGTTGTTGCCAGGCTTGGGTCCAGATTGAGATCCAGGCATCAGGAGAGGTTGTTTTGTTAAAAGTGTGGC  
TGGAGCAGCATGCAAGGATGAAAAAGAAGGAGAAAGAATGGACTCTTCAAGTAAATGTTGAGGAAGATATTTCTGAAGAGAATTAGCAGAAGAGGCTATGG  
ATAGGACAATAGAAGAGGAGACCAGAGGAGAGGAGAAAAAATGGAGCAAGGTGGGAAAATGCAGAATGAAGGGAATGTA

cg15781156 Speichel 18% (18%), Blut 44% (6%), Sperma 69% (2%)

**Digestion controls**

**VK\_GlaI cg15183843 ca. 3,5kb distance**

Homo sapiens chromosome Y, GRCh38.p13 Primary Assembly Position: 12421150 to 12421449

CACGAACCCGCAGAACAGAGGCGCGTCTTTGGGAAGCCGCTGGATTCCAGGCCTGGGGGCGACAGCGTGGCTGCCTCGACACCCTCGGCTGCAGGCCTC  
GCCGGTGTACCCCCGGCTCCTACTACTCCATGTCACCTGCGCCATGGGGCCCCGGCTCCCCGACGCCCTGAGACCCCCACGCCCGCAATTCCTCCT  
CGGCGCTCTAGTTCAGCCTCGTGCCTCTGGCCAGGGCCCCCTTGACCCCTGTCTCCACAGTACCTGCGACCCCGCTGATTCTAATACCCATGCGCCCA  
GCAACGACACCCGACGCGGAACACCCGCCGACCTCAGCGGTGTCAGCAGTGCCCGCTGCGCCAACGCGACTTGCTTGGAGTACTGGTACATCCTCTCCCCAA  
CCCAGCTGCCCCCGACCCGGTCAACCCCTCTCCACTCCCTGGCCACCCTGCGCTCCCGGACCCAGTATCTGCACCTCCTCCGAGCTTGGAGTGCCTGTGCCG  
TGTCGCCAGGCCAGGCGCCCTCCCCGTCCTCCAGTGCAGCCCCACCCAGCCACTCCTGCGCTCTCGCCGCCCTCCTCCCCGTCCCGGCTTCTGCCA  
TCCTCTCAAACGCGCCCCGAATCCCCTCACGCCCTGCACCTCTCCCTCCCAGCGCTCCCGCAGCCTCTGCCTTGGGCCTGCGCTCCCTCCCAAGCCTCA  
GCTCTAGTCCCCCGCTGTCTCCTCATACTGAGGCAGCCTCCGTCTCCCGTGCCACTGCGCTGGACCACCTGTACTCCTCAGCACTCGCGCTCGG  
CTCGGCCACCCACCCGCAAACGCGCGTCTAGCCTATCCCTGCGCCCGCACCCCTCCCGCCTTTGCTTTGGGCAACCTCTCTGACCTCCAGCTCCCAAGCGCTCGG  
CTCGCCCCACCTCTGCACCTCAAGGCCGCGCCCTCCCCAGCCCCAGCCTCTGCCTCTGGGTTCCGCCCGCGCCCGCTGTACGCCACCCACCCTCGAGACC  
TCCTAGGCGTTGCGGCAGCCTCAACGCGCCCCGGCCCCAGCCGCGCCAGGCTCCTCCACTGCATACGATCCCCTGCACCCCGCTGCAGCCCCCGCACCTCT  
CCGGCGCCTGGCTGCCTTGCCCAAAGCCGGCGCTGGGGCCCCGGAGGGCAGCGATTGCCTCTGTCTGAAGCCCGGCCCGCTCCGCCAGCCTGGTA  
GGCGCGGGTTCAGCTCCTCAGCCCTGCAGCCCTGCCGCAAGCCCGCGCTCCTGCTGTCCAGCCCCAGCTACCAAGGAGAGAGACCCAGGAACCGCCAGT  
GGCTGCGCTCCACGCCGCGCGCCAGCCCTCGCCACCGCGGCCCTTGGCAGTTGGCGGTTTCTAGGTTTGGACATTTAACCTTTAATTGGCCGGCCCCAAA  
GTAATGTTTTGCGATGACTTAAGGCCCTGGGCCAAAGGCCAGCGCGCAGCCGAGTGGAGCCGCTCTGGAAGCTCCAGAGGAGAAAGCAGAGCTCATAC  
ACTATCTTGTGAATGCATGAAAAATACACGTGCGCAAACCTGCACGCATGAATGAATGAATGCACGAAAGAGAGAAAAAATGAGTGTTCAGGCCTCAG  
CTGTTGAATA

VK\_Gla\_for\_I Tm 66°C, 19bp

VK\_Gla\_rev\_I Tm 66°C, 19bp

**VK\_lalu I cg15183843**

AAGCCAGGAGAGAGGCTCAGGAGGAACAGCCCTGCCACACTTACCTTGATCTCAAACCCAAAAGAGAATGCAGACAGGCTGCTGCTATTAGAGTGAGAGT  
TTTATGGAACACTGACACCCCTGTTTCTCTTTGGTTTAGAGTTGGGGGAATACTGACCACAGTACACAATGACAAGACAACACCAAGTTGGACAAGAGCT  
CTCCAGCAACAAGGTATCCGAGACTCAGACTTCTGCTTTGGAACAAAAATGTGCACCTCCTGAAGTTAGCCACTTCCCATCCAGGACACTGTAAAACCATCTA  
AAGTGCAAGACAGACCAGCGGATTGAAATAGAACAGATCATGAAACATTGATTGATAGGTGCTTACCTTCCACATCACCTTGCCCTGAAGAAACAACCTGGT  
ATCAAGTCTGGTGGCGCGCACAGAACATCCAAATTATCCAATGCTGCTGCTTCAAAGAGGGAGTTTCACTTTCATGTGCCAGTGGCGAGACTTTCAGCA  
AAGGCACGGAGTGGAAAAACAGCAAAAGAATTGTCACTACACTACAGCCCAAAAAAGGAGACACTGTACAAAAATCAAGTCCAGCCTGGAGATTGCAGTG  
GCTTAGAATTTTACTGACTCTGTGACAACAGTTTCTTTCTACCCCTTGCCTGCCCCCTGCACTCAAGGAATCTTCTGATCACCCCTCAGAAATATCTTAGCATCTT  
CTTCTCAGCCCTTCTACTCAAAGGCAGTTTCTGTTTTCTGCAAGAGTTGAGTCTTCTCTTGGCATGAGG

cg15183843 (-vaginal, 96% Speichel, 85% Blut, 82% Sperma)

VK\_lalu\_I for

GCTTCCACATCACCTTGCCC

VK\_lalu\_I rev

CCGTGCCTTTGCTGAAAGTCT

VK\_lalu\_II 27254225 ca. 4kb distance

AGATCCTTTGTTCTGAGGCTCACTCATCTCCGAGCCCGAGCCGTCTCCAGCCTCAGACGGCTCTGCGGCTGCTGATCTGTGCAGCTGGCAGCGGC GGCGCT  
GGCGTGTGACATTTTACAGCCCTTTCAGAGGCATGTGTGCTAGGGATGCCGAAATGCCGAGA GCGCGGGCAGGACTAGCTTCCGGGCCGCGCTTTGTGT  
GCTGGCTGCTGAGTGTGGCGGGGCGAGGAAGCTGGTAGGGCGGTTGTCGCAAGCTCCA GCTGCAGCTCCGCTACGTGAGAAGACTAGAAAGCGGCGCA  
GGACCAGGCCTGCGTTGTTTGC

VK\_lalu\_II\_forw 20bp 66Tm

VK\_lalu\_II\_rev 19bp 66Tm

VK\_lalu\_III cg17913570 ca. 1.7kb distance

GGGCCTGTCCACTTGACGGAAGCCCTGTAGTTAGAAGCGACAGCAGGGTCGTGCCTGGCGCTCCATGGGAATTGGGTGGGTGCAAAGGAAGTTATATAGG  
CTCAAGGCCTACACACCTTTGGGTGACGCGCCGCGAGGGGAAGAAAGCATATCTGGGGAGCTGG

VK\_lalu\_III\_forw Tm 64°, 21bp

VK\_lalu\_III\_rev Tm 64°, 21bp

VK\_lalu\_IV cg05999368 ca. 0.5kb distance

AGTGATCATTGAGAGTACTGCCTTGGCATCCTCGGTAAGGAGCGCTCCAGCATGGTAGGGAGCTGGTGTGTGGGAGGGTAGGTCTGGCATGAACCTTC  
CTGACTCCTCTCTGCAGGATACGGGATGTCTATTCCACTGCAGTCTAGTGGTTGTGGGATCATGAAGGTCAAGCCTCCA GCTGCAGGCCGTACAGCTCCTA  
CCTGACCTTCTTCTCAGCTGGTTGGCTGACCATGACTGCCAGGTTCTGGCAGGATTGCTGAGGTGAGCGCCAGGTAGGGCATCATGGGA

More matches on Y Chromosome !!

VK\_lalu\_IV\_forw Tm 64, 20bp

VK\_lalu\_IV\_rev Tm 62, 19bp
